# Supplementary material for: Influence of interface properties on charge density, band edge shifts and kinetics of the photoelectrochemical process in p-type NiO photocathodes
Source: Royal Society of Chemistry journal article supplement (doi:10.1039/c5ra13135a), 2015-01-01
Supplement: c5ra13135a1.pdf [file c5ra13135a1.pdf]

## Supporting Information

### **Influence of Interface Properties on Charge Density, Band Edge Shifts, and kinetics of Photoelectrochemical Process in p-Type NiO Photocathode**

Qian Liu, Lifang Wei, Shuai Yuan, Xin Ren, Yin Zhao\*, Zhuyi Wang, Meihong

Zhang, Liyi Shi\*, Dongdong Li, Aijun Li

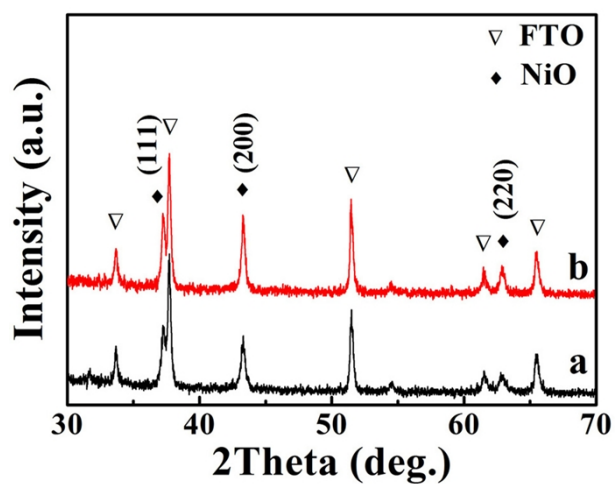

**Fig. S1.** XRD film diffraction patterns of the (a) NiO and (b) NiO-Ac films. The NiO peaks are indexed according to JCPDF file 65-2901. The FTO peaks are indexed according to JCPDF file 01-077-0447.

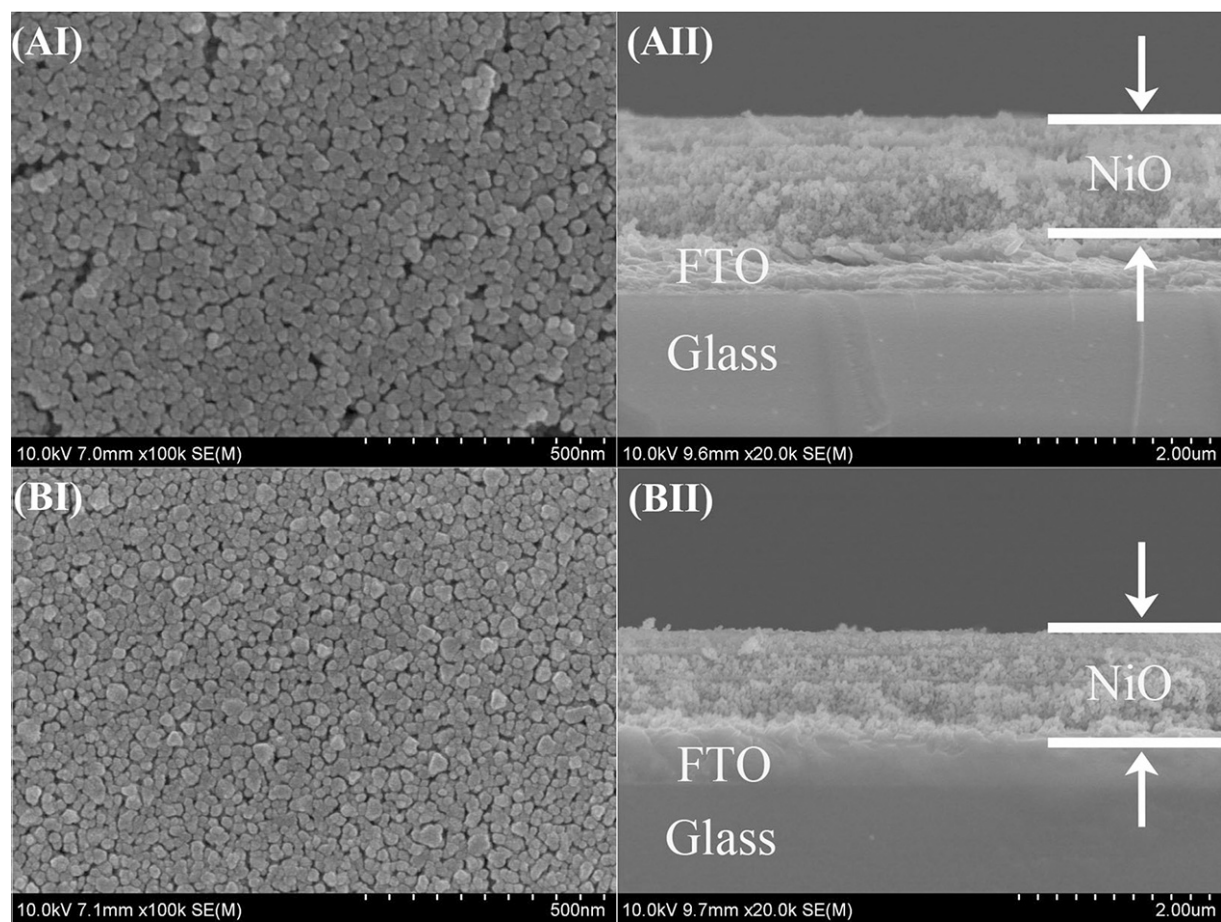

**Fig. S2.** SEM of (I) surface and (II) cross-section for (A) NiO and (B) NiO-Ac films.

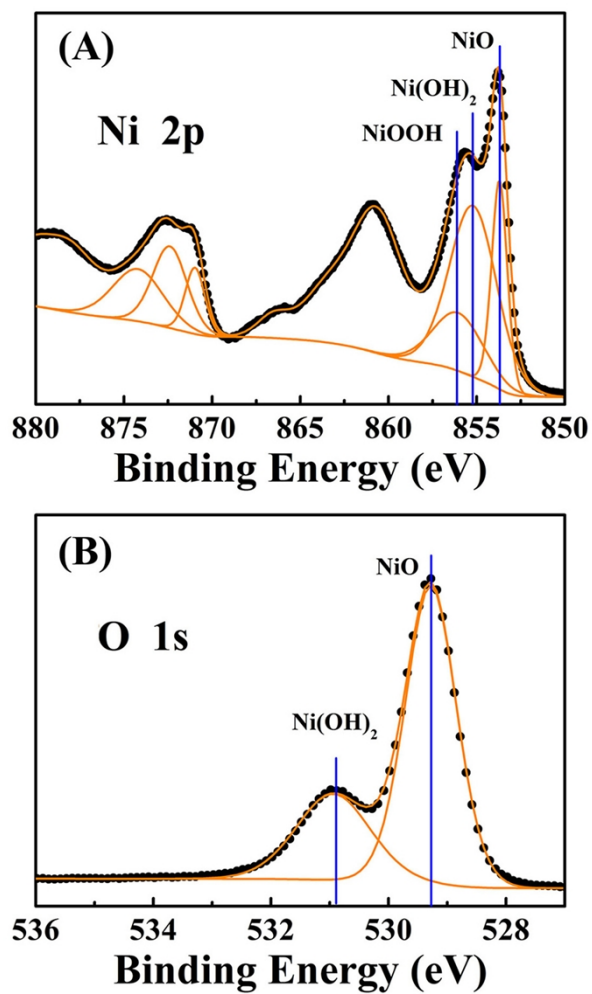

**Fig. S3.** Results of the XPS analysis: (A) Ni 2p and (B) O 1s spectra for NiO-Ac. Raw data is given by (●) and with fitted components (orange lines).

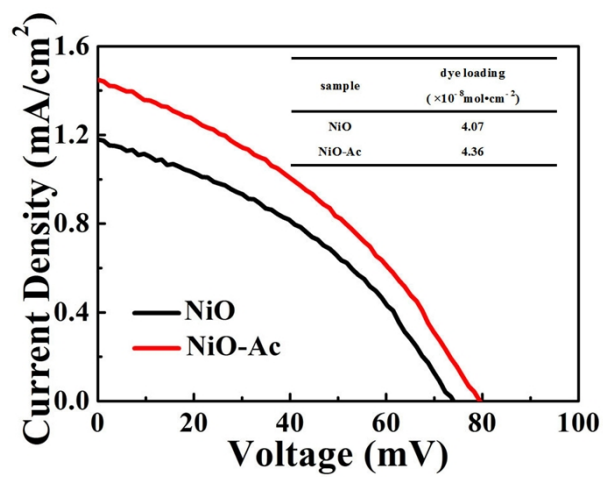

**Fig. S4.** Current-voltage characteristics of NiO and NiO-Ac devices under standardized AM 1.5 illumination of  $100 \text{ mW/cm}^2$  (active area  $0.25 \text{ cm}^2$ ).

**Table S1. Comparison of the EIS fitting data for the bare and post-treated NiO****DSSCs.**

| sample    | $R_s$ ( $\Omega$ ) | $R_{pt}$ ( $\Omega$ ) | $R_t$ ( $\Omega$ ) | $R_{rec}$ ( $\Omega$ ) | N    | $C_\mu$<br>[mF/cm <sup>2</sup> ] | $T_{th}$<br>[ms] | $T_h$<br>[s] | $L_n$<br>[um] | $\eta_{cc}$ |
|-----------|--------------------|-----------------------|--------------------|------------------------|------|----------------------------------|------------------|--------------|---------------|-------------|
| NiO       | 10.5               | 0.75                  | 10.7               | 280                    | 0.93 | 0.87                             | 9.3              | 0.24         | 5.1           | 0.96        |
| NiO-S     | 11.2               | 1.43                  | 11.9               | 452                    | 0.93 | 0.86                             | 10.3             | 0.39         | 6.1           | 0.97        |
| NiO-ozone | 10.1               | 0.46                  | 9.2                | 200                    | 0.94 | 0.81                             | 7.4              | 0.16         | 4.6           | 0.95        |

For a more exact fitting, the capacitance element is replaced by a constant phase element (CPE), in which  $Y_0(Q)$  is a constant with the dimension of Siemens·sec <sup>$\alpha$</sup> , and  $\alpha(N)$  is an empirical constant. All the parameters above could achieve by transmission line equivalent circuit. When CPE is in parallel with a resistance, the capacitance can be calculated by the following Equation<sup>1</sup>:

$$C_\mu = (QR)^{1/N} / R \quad (S1)$$

After calculated the parameter  $C_\mu$ , then the other parameters shown in Table S1 were

calculated by using the following Equations<sup>2-4</sup>:

$$\tau_h = R_{rec} C_\mu \quad (S2)$$

$$\tau_{th} = R_t C_\mu \quad (S3)$$

$$L_n = d \sqrt{R_{rec} / R_t} \quad (S4)$$

$$\eta_{cc} = 1 - \tau_{th} / \tau_h \quad (S5)$$

$C_\mu$ : Chemical capacitance calculated by fitting data

$R_s$ : Series resistance measured by impedance

$R_{pt}$ : Charge-transfer resistance at counter electrode measured by impedance

$R_t$ : Transport resistance of the film measured by impedance

$R_{rec}$ : Recombination resistance of the film measured by impedance

$L_n$ : hole diffusion length

$\eta_{cc}$ : charge collection efficiency

All the bias in Fig. 5 have been corrected by Equation:

$$V_{corr} = V_{app} - I_{dark} g(R_s + (1/3)R_t + R_{pt}) \quad (S6)$$

**Table S2. Comparison of  $\alpha$  parameters calculated from  $C_{\mu}$  that obtained by EIS.**

| sample    | $\alpha$ |
|-----------|----------|
| NiO       | 0.024    |
| NiO-S     | 0.023    |
| NiO-ozone | 0.053    |

The parameter  $\alpha$  could be achieved by fitting the plots in Fig. 5C using the exponent Equation (3), which represents for the depth of the trap energy distribution, and the  $\alpha$  is an absolute value.



**Table S3. Comparison of short-circuit photocurrent density ( $J_{sc}$ ), open-circuit photovoltage ( $V_{oc}$ ), fill factor (FF), measured under AM 1.5, of p-type DSSCs employing bare NiO and post-treated NiO film.**

| sample    | $V_{oc}$<br>[mV] | $J_{sc}$<br>[mA/cm <sup>2</sup> ] | FF<br>[%] | $\eta$<br>[%]     |
|-----------|------------------|-----------------------------------|-----------|-------------------|
| NiO       | 74               | 1.18                              | 37.7      | $0.032 \pm 0.002$ |
| NiO-S     | 81               | 1.13                              | 39.2      | $0.036 \pm 0.002$ |
| NiO-ozone | 66               | 0.72                              | 42.2      | $0.020 \pm 0.001$ |
| NiO-Ac    | 80               | 1.45                              | 36.2      | $0.042 \pm 0.002$ |

**Table S4. Surface analysis by XPS spectra for the Ni(CH<sub>3</sub>COOH)<sub>2</sub> treated NiO.**

| sample | O1s    |                     |       | Ni2p <sub>3/2</sub> |                     |        | (NiO:Ni(OH) <sub>2</sub> :NiOOH) |
|--------|--------|---------------------|-------|---------------------|---------------------|--------|----------------------------------|
|        | NiO    | Ni(OH) <sub>2</sub> | NiOOH | NiO                 | Ni(OH) <sub>2</sub> | NiOOH  |                                  |
|        | [eV]   | [eV]                | [eV]  | [eV]                | [eV]                | [eV]   |                                  |
| NiO-Ac | 529.28 | 530.94              | -     | 853.71              | 855.20              | 856.05 | 1:2.49:0.90                      |

## Notes and References

- 1 Z. CHuang, G. Natu, Z. Ji, P. Hasin, Y. Wu, J. Phys. Chem. C, 2011,115, 25109-25114.
- 2 Q. Wang, S. Ito, M. Grätzel, F. Fabregat-Santiago, I. Mora-Seró, J. Bisquert, T. Bessho, H. Imai, J. Phys. Chem. B, 2006, 110, 25210-25221.
- 3 J. Bisquert, F. Fabregat-Santiago, I. Mora-Sero, G. Garcia-Belmonte, S. Gimenez, J. Phys. Chem. C, 2009, 113, 17278-17290.
- 4 Z. Huang, G. Natu, Z. Ji, M. He, M. Yu, Y. Wu, J. Phys. Chem. C, 2012 ,116, 26239-26246.
